# Supplementary material for: Impact of whole-genome duplications on structural variant evolution in Cochlearia
Source: Springer Nature journal article supplement (doi:10.1038/s41467-024-49679-y), 2024-06-25
Supplement: 41467_2024_49679_MOESM1_ESM.pdf [file 41467_2024_49679_MOESM1_ESM.pdf]

**Impact of whole-genome duplications on structural variant evolution in  
*Cochlearia***

Hämälä *et al.*

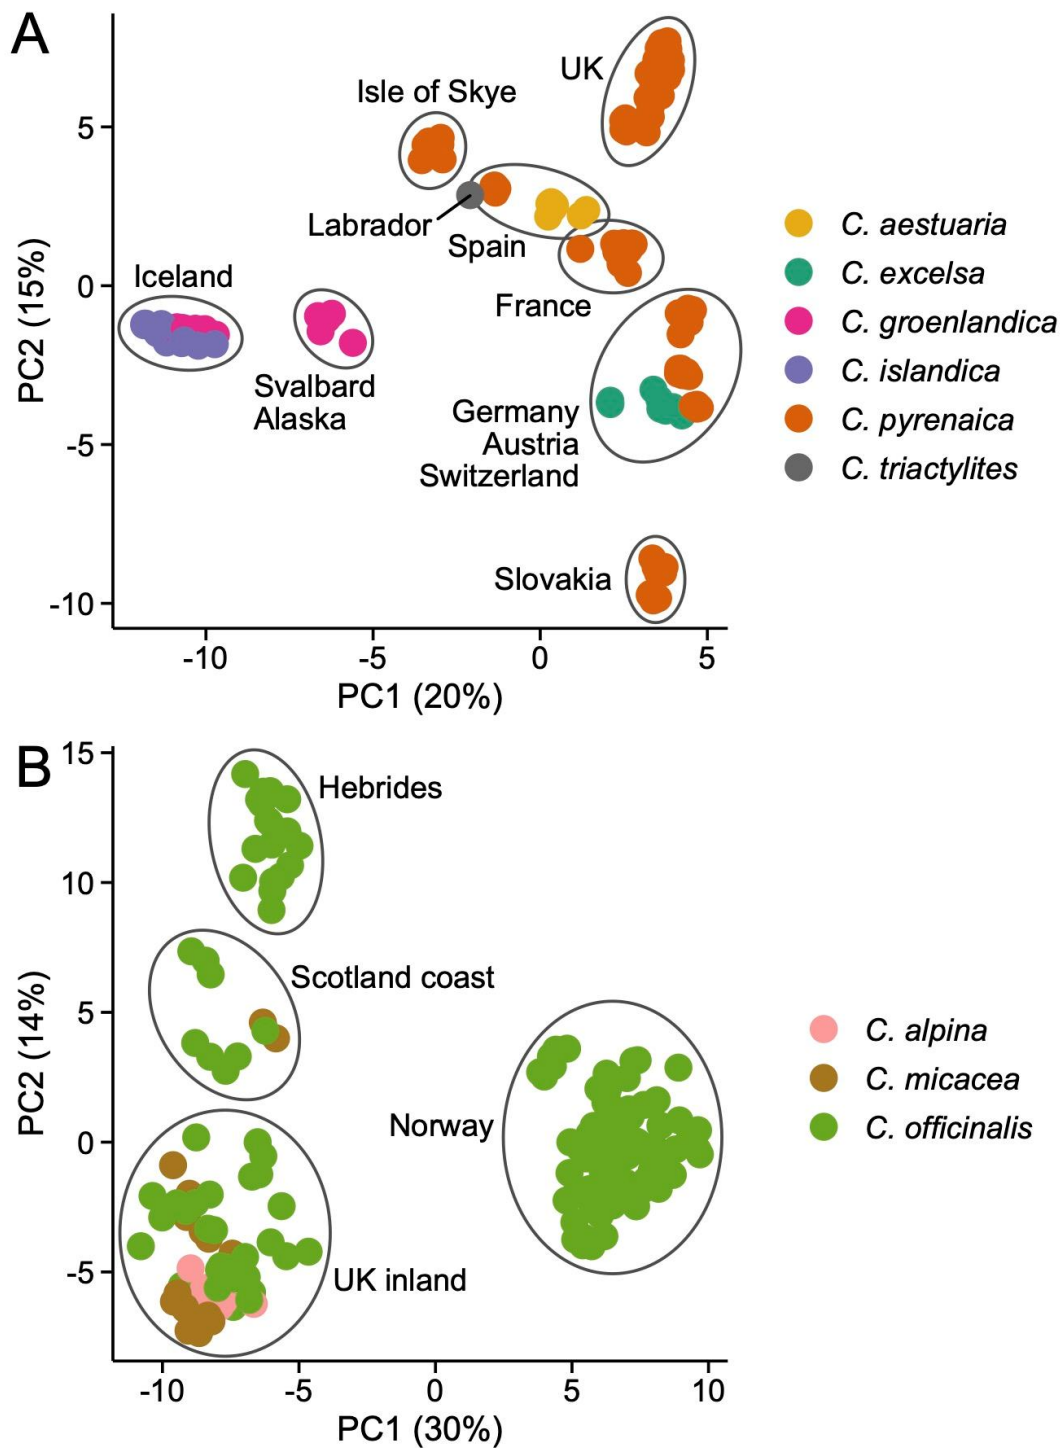

**Supplementary Figure 1. PCA conducted separately on diploids (A) and tetraploids (B).** Species are marked with colours. The proportion of variance explained by the PCs is shown in parentheses. Source data are provided as a Source Data file.

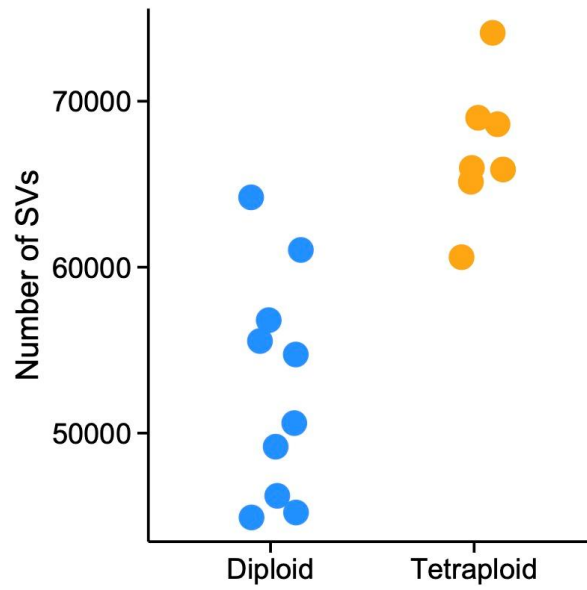

**Supplementary Figure 2. Number of SVs found in long-read sequenced samples after equalising the alignments to same number of base pairs covered (mean read length × number of reads).** Poisson model-based LRT for a difference between the ploidies: deviance = 13980, DF = 1,  $P < 2 \times 10^{-16}$ . Source data are provided as a Source Data file.

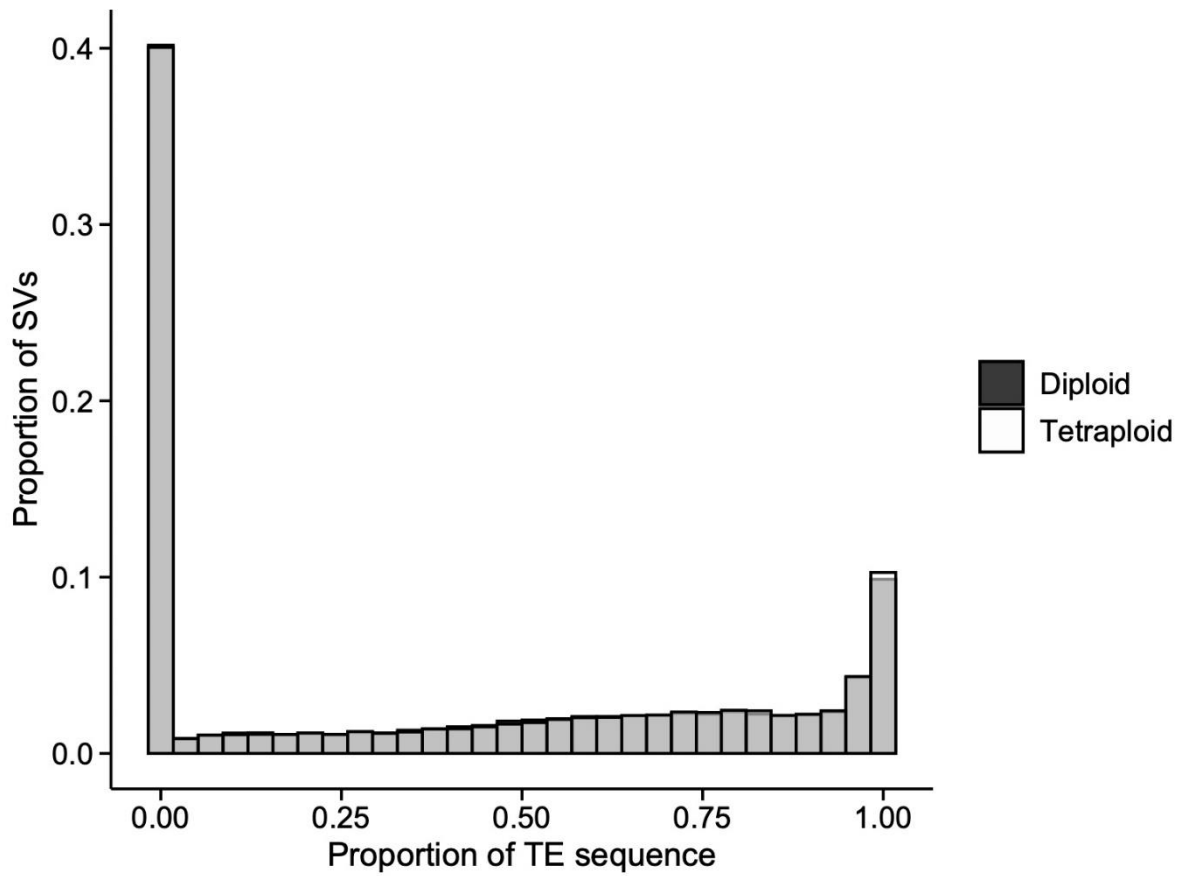

**Supplementary Figure 3. Proportion of TE sequence found in SVs.** Source data are provided as a Source Data file.

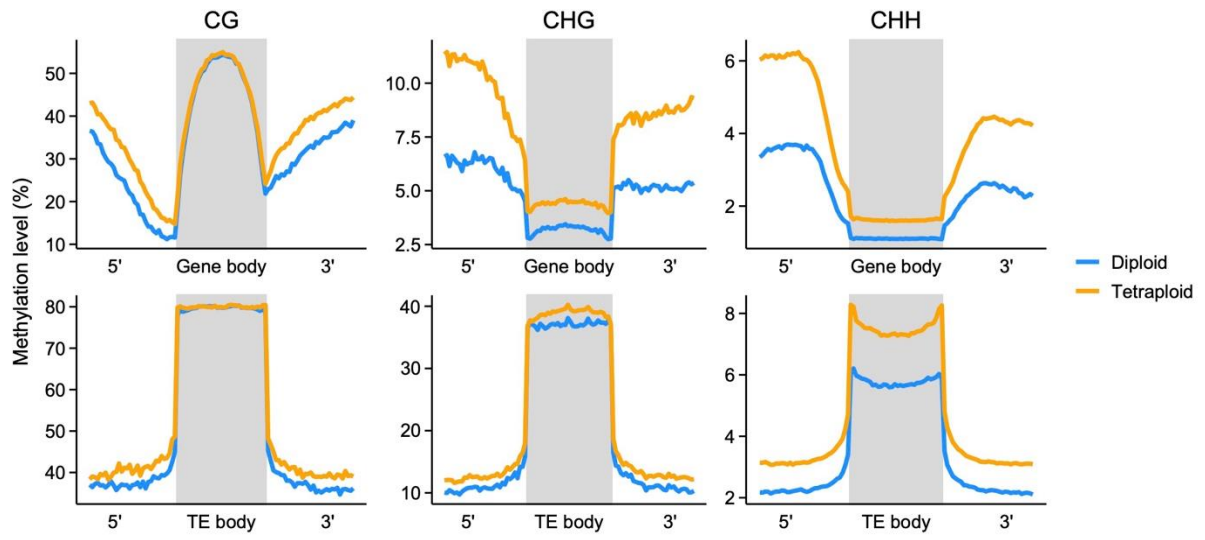

**Supplementary Figure 4. Methylation levels across meta-genes and meta-TEs, shown for CG, CHG, and CHH contexts.** Note the difference in y-axis scales between the panels. Source data are provided as a Source Data file.

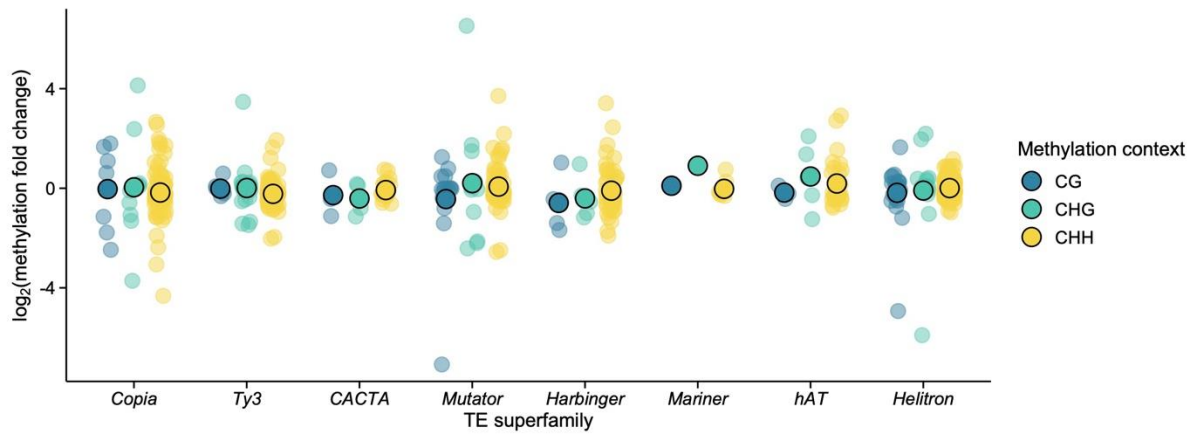

**Supplementary Figure 5. Methylation difference between diploids and tetraploids shown for differentially methylated TE families.** Source data are provided as a Source Data file.

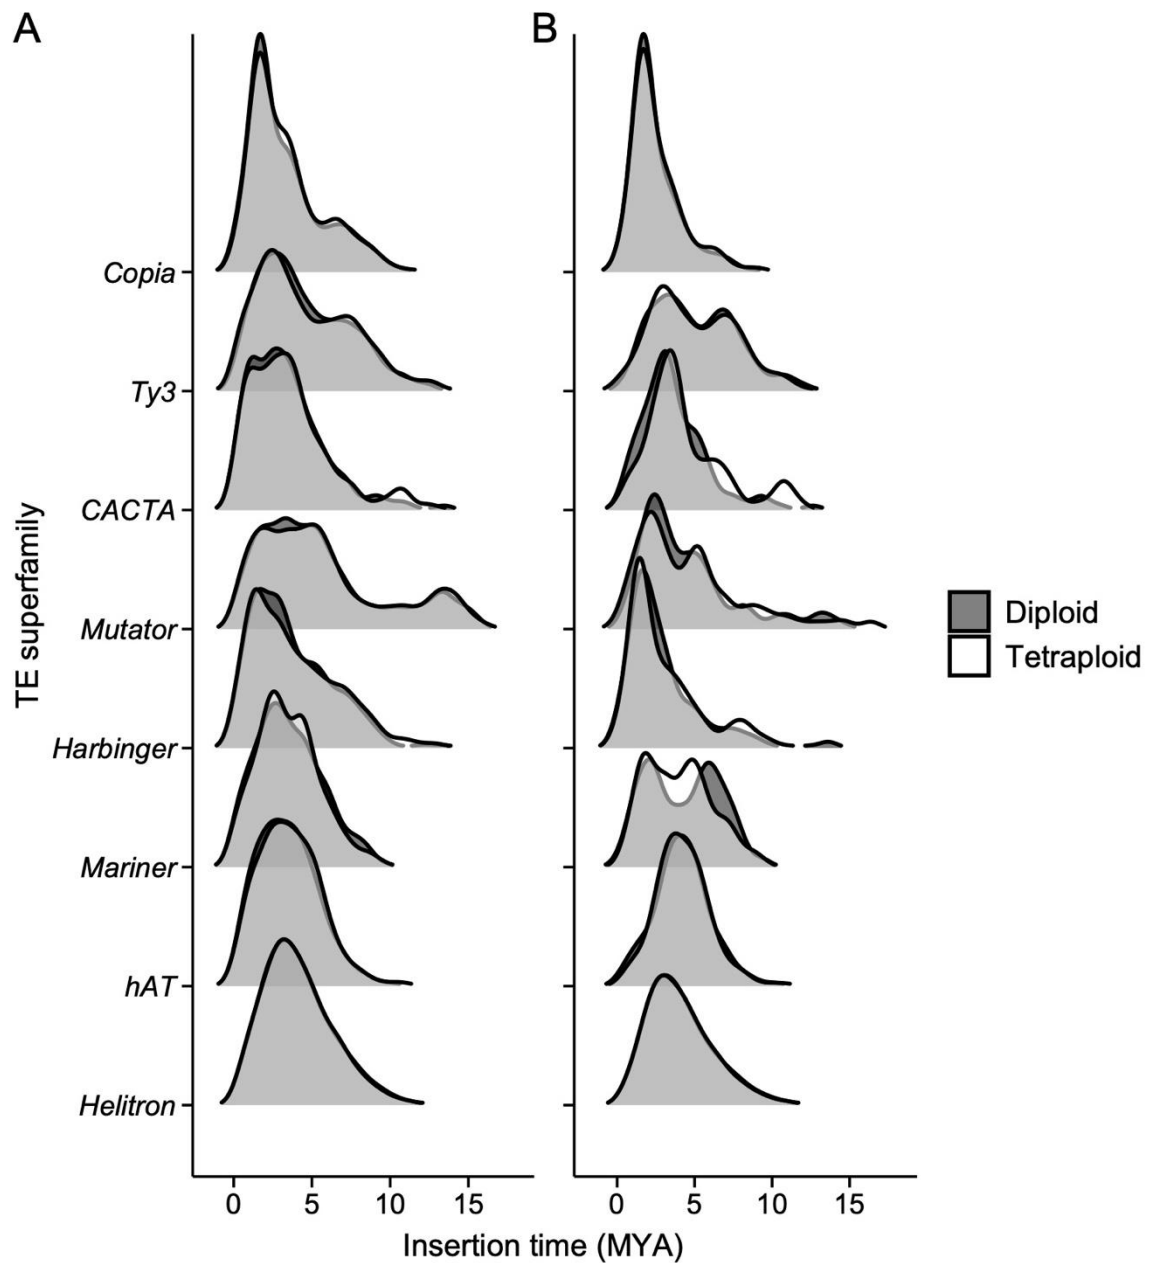

**Supplementary Figure 6. Distributions of TE insertions times in diploids and tetraploids. A:** All TE families. **B:** Differentially methylated TE families. Source data are provided as a Source Data file.

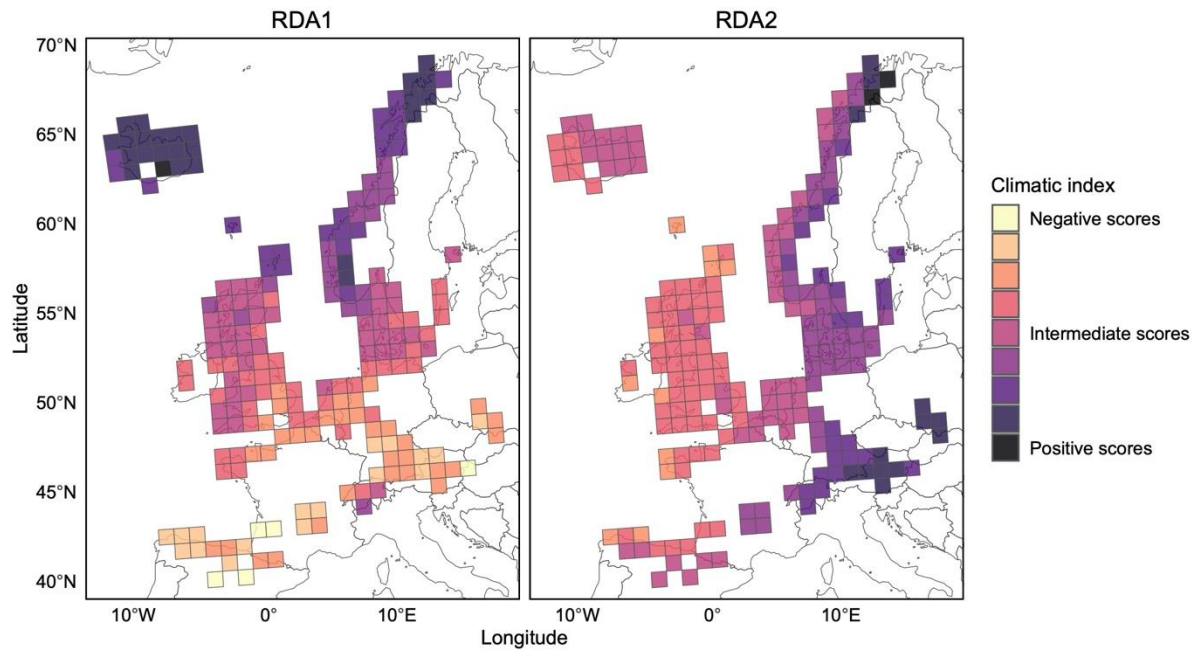

**Supplementary Figure 7. Climatic index (based on combined SV and SNP outliers) predicted across the European range of our focal *Cochlearia* species.** Similar colours indicate higher similarity in the genetic composition of the populations. Shown are two RDA axes used in the prediction of climatic distance between SVs and SNPs. Map data: GISCO, licensed under CC by 4.0. Source data are provided as a Source Data file.



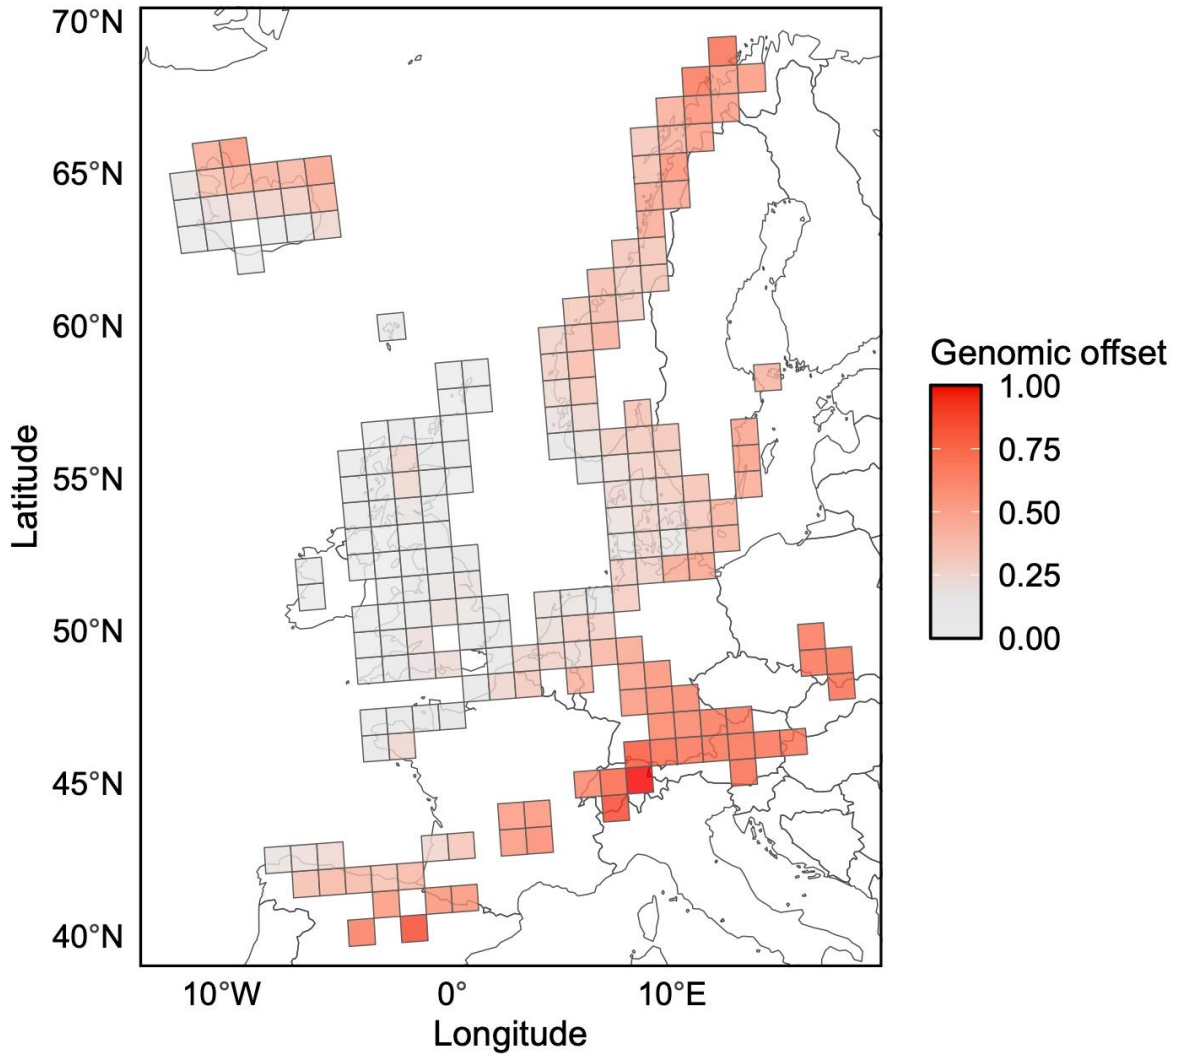

**Supplementary Figure 8. Genomic offset between past (1970 – 2000) and future (2061 – 2080) climatic conditions, predicted using all climate-associated variants (SVs and SNPs).** Colour scale indicates the relative level of genetic change that would be required to track climate change. Map data: GISCO, licensed under CC by 4.0. Source data are provided as a Source Data file.

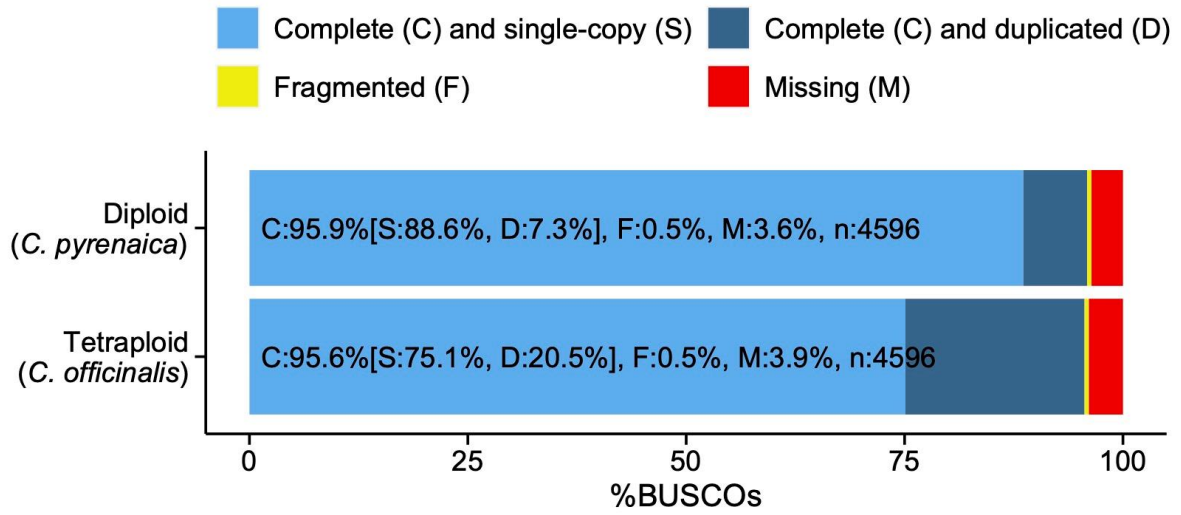

**Supplementary Figure 9. BUSCO results in the newly assembled diploid and tetraploid genomes.** Source data are provided as a Source Data file.

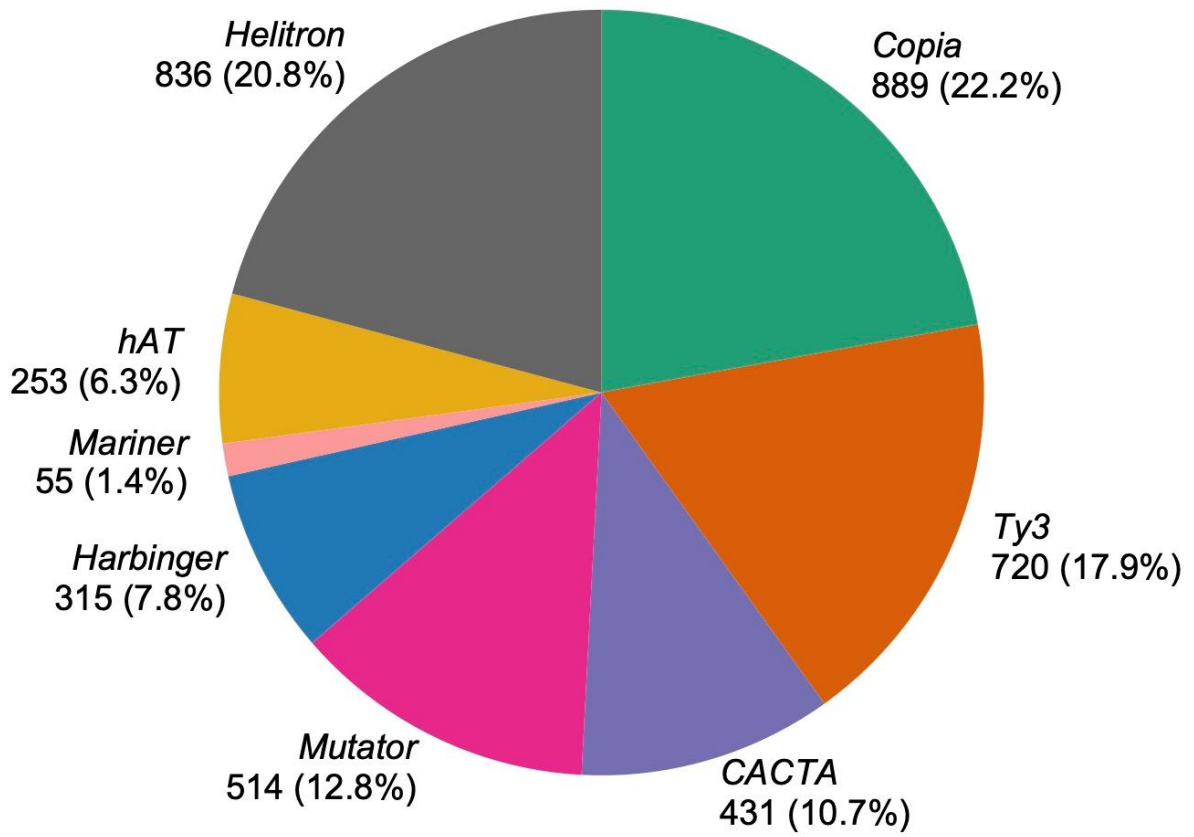

**Supplementary Figure 10. Number and proportion of TE superfamilies annotated in three different *Cochlearia* assemblies.** Source data are provided as a Source Data file.

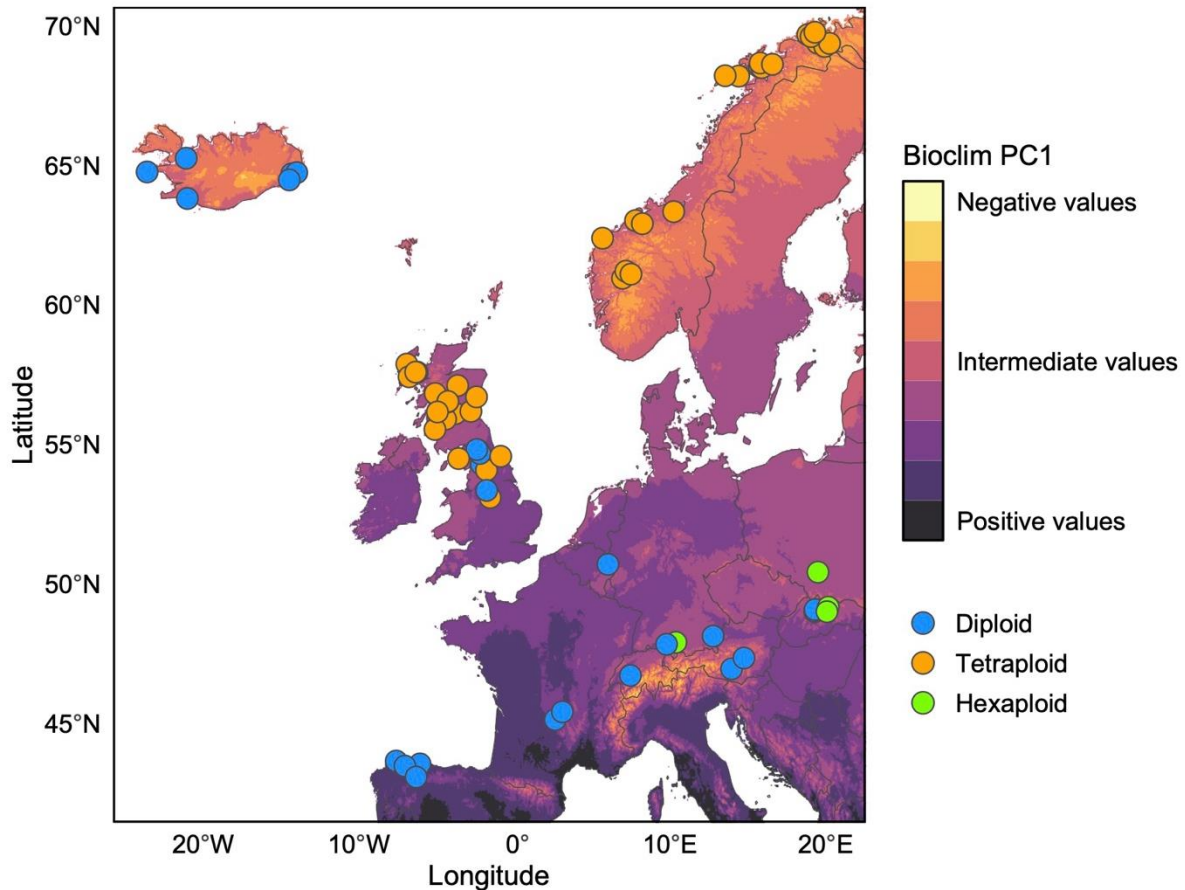

**Supplementary Figure 11. Geographical variation across 11 bioclimatic variables used in our GEA, summarised as the first principal component (PC) of the data.** Coloured circles show 70 *Cochlearia* populations used in the analyses. Source data are provided as a Source Data file. Following bioclim variables were used (in the order of their significance in explaining genetic variation among the populations):

- bio2 = Mean diurnal range
- bio3 = Isothermality
- bio9 = Mean temperature of driest quarter
- bio15 = Precipitation seasonality
- bio18 = Precipitation of warmest quarter
- bio8 = Mean temperature of wettest quarter
- bio10 = Mean temperature of warmest quarter
- bio7 = Temperature annual range
- bio1 = Annual mean temperature
- bio5 = Max temperature of warmest month
- bio11 = Mean temperature of coldest quarter

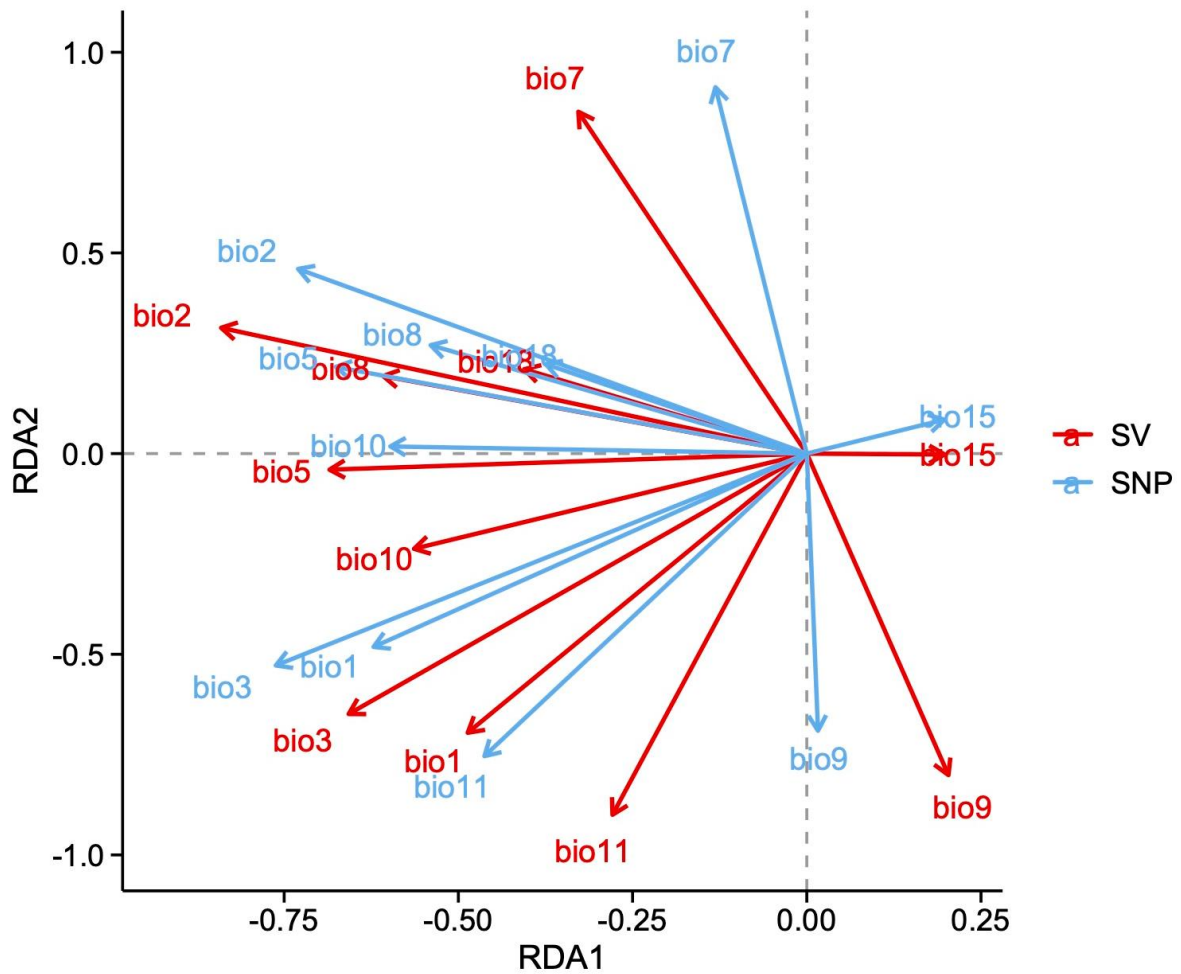

**Supplementary Figure 12. Loadings of 11 bioclimatic variables on first two RDA axes, shown for outlier SVs and SNPs.** Length of the arrows indicate the load of each variable on the axes. Source data are provided as a Source Data file.

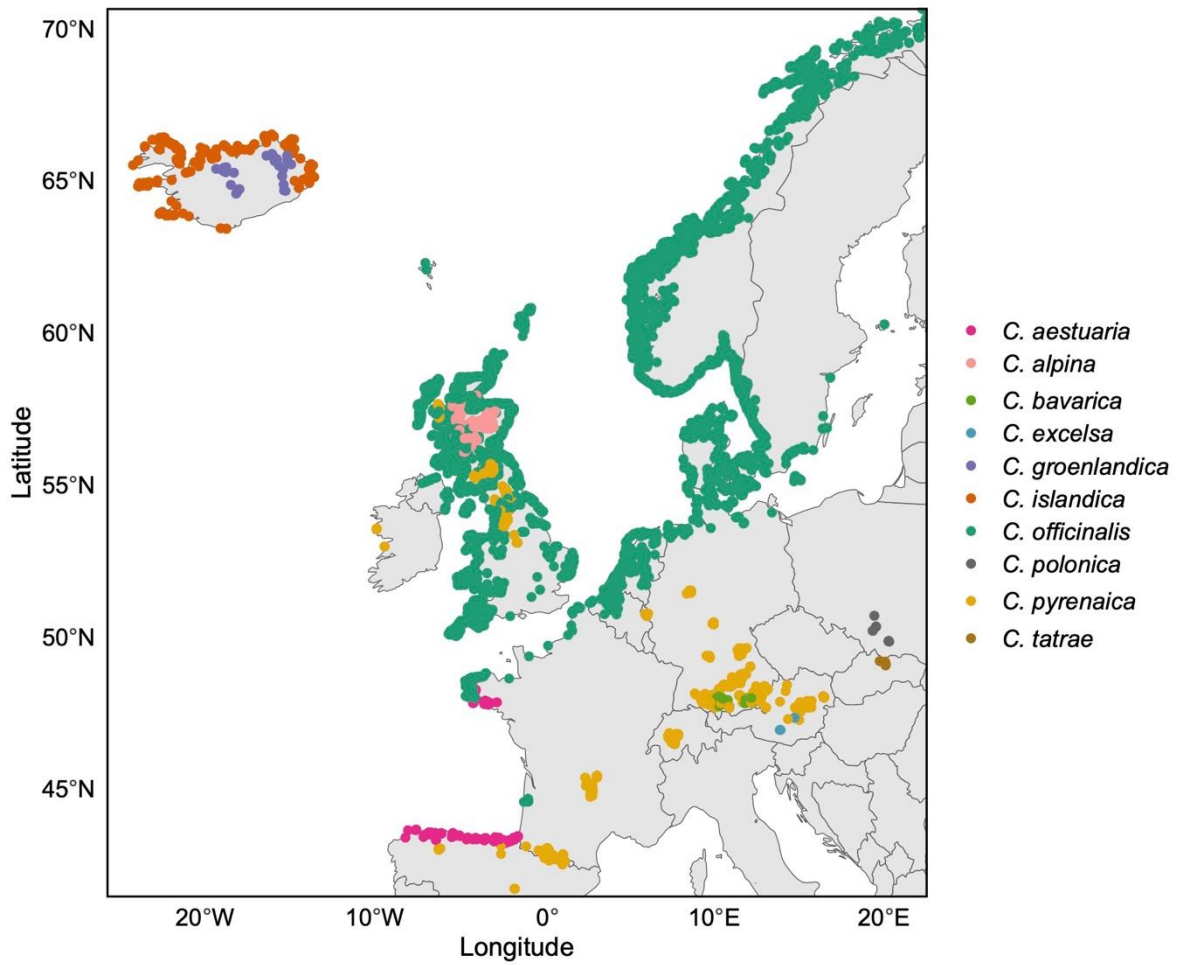

**Supplementary Figure 13. Occurrence records for the *Cochlearia* species acquired from GBIF (<https://www.gbif.org>) and manually curated. Source data are provided as a Source Data file.**

**Supplementary Table 1. Summary of the long-read sequenced samples.**

| ID     | Ploidy | <i>Cochlearia</i> species | Country | Sequencing technology | Read length N50 (kb) | Mean depth | Mapping rate (%) |
|--------|--------|---------------------------|---------|-----------------------|----------------------|------------|------------------|
| C10    | 2      | <i>pyrenaica</i>          | OS      | ONT                   | 8.9                  | 26.1       | 98               |
| C12    | 2      | <i>pyrenaica</i>          | DE      | ONT                   | 5.8                  | 24.1       | 99               |
| C13*   | 2      | <i>pyrenaica</i>          | DE      | ONT                   | 8.7                  | 9.0        | 98               |
| C14    | 2      | <i>aestuaria</i>          | ES      | ONT                   | 11.8                 | 24.6       | 98               |
| C17    | 2      | <i>pyrenaica</i>          | FR      | ONT                   | 7.6                  | 24.0       | 97               |
| C18*   | 2      | <i>groenlandica</i>       | IS      | ONT                   | 4.3                  | 9.1        | 97               |
| C19    | 2      | <i>aestuaria</i>          | ES      | ONT                   | 10.4                 | 28.4       | 99               |
| C2     | 2      | <i>excelsa</i>            | OS      | ONT                   | 7.8                  | 28.9       | 98               |
| C20    | 2      | <i>pyrenaica</i>          | OS      | ONT                   | 6.8                  | 14.7       | 99               |
| C21    | 2      | <i>pyrenaica</i>          | FR      | ONT                   | 6.4                  | 25.3       | 97               |
| C23*   | 2      | <i>pyrenaica</i>          | UK      | ONT                   | 11.4                 | 6.3        | 99               |
| C5*    | 2      | <i>islandica</i>          | IS      | ONT                   | 10.3                 | 8.2        | 96               |
| LAB 22 | 2      | <i>pyrenaica</i>          | UK      | ONT                   | 7.0                  | 62.5       | 98               |
| NEN 30 | 2      | <i>pyrenaica</i>          | UK      | PacBio                | 16.1                 | 21.9       | 100              |
| BPS 1  | 4      | <i>officinalis</i>        | UK      | ONT                   | 7.3                  | 82.6       | 100              |
| CUR    | 4      | <i>officinalis</i>        | UK      | ONT                   | 5.4                  | 48.7       | 92               |
| ELI 23 | 4      | <i>officinalis</i>        | UK      | ONT                   | 7.2                  | 75.8       | 98               |
| ONI 12 | 4      | <i>officinalis</i>        | UK      | ONT                   | 7.6                  | 58.1       | 93               |
| ROT 20 | 4      | <i>officinalis</i>        | UK      | ONT                   | 7.4                  | 85.2       | 99               |
| ROT 26 | 4      | <i>officinalis</i>        | UK      | PacBio                | 7.4                  | 57.3       | 99               |
| TRE 13 | 4      | <i>officinalis</i>        | UK      | ONT                   | 8.5                  | 69.4       | 95               |
| C27    | 6      | <i>tatrae</i>             | SL      | ONT                   | 5.8                  | 18.3       | 97               |
| C24    | 8      | <i>anglica</i>            | UK      | ONT                   | 4.9                  | 27.6       | 98               |

\*Excluded from the main analyses due to low sequencing depth.

**Supplementary Table 2. Validation of Sniffles2 (v2.2) using simulated autotetraploids.**

| Genomic feature                     | Allelic dosage | Simulated depth |      |      |      |      |      |      |      |      |      |
|-------------------------------------|----------------|-----------------|------|------|------|------|------|------|------|------|------|
|                                     |                | 5×              |      | 10×  |      | 20×  |      | 40×  |      | 80×  |      |
|                                     |                | R               | P    | R    | P    | R    | P    | R    | P    | R    | P    |
| All                                 | 1              | 0.25            | 0.99 | 0.50 | 0.99 | 0.76 | 0.98 | 0.89 | 0.98 | 0.97 | 0.98 |
|                                     | 2              | 0.48            | 0.98 | 0.75 | 0.98 | 0.91 | 0.96 | 0.96 | 0.96 | 0.98 | 0.94 |
|                                     | 3              | 0.64            | 0.98 | 0.85 | 0.97 | 0.95 | 0.94 | 0.97 | 0.93 | 0.98 | 0.92 |
|                                     | 4              | 0.70            | 0.98 | 0.86 | 0.96 | 0.93 | 0.92 | 0.96 | 0.90 | 0.98 | 0.89 |
| Exon                                | 1              | 0.26            | 1.00 | 0.52 | 1.00 | 0.79 | 0.99 | 0.92 | 1.00 | 0.98 | 0.99 |
|                                     | 2              | 0.51            | 1.00 | 0.79 | 0.99 | 0.93 | 0.99 | 0.98 | 0.99 | 0.99 | 0.99 |
|                                     | 3              | 0.67            | 0.99 | 0.88 | 0.99 | 0.97 | 0.99 | 0.99 | 0.99 | 1.00 | 0.99 |
|                                     | 4              | 0.72            | 0.99 | 0.89 | 0.99 | 0.95 | 0.99 | 0.98 | 0.99 | 0.99 | 0.98 |
| Intron                              | 1              | 0.26            | 1.00 | 0.52 | 1.00 | 0.79 | 0.99 | 0.91 | 0.99 | 0.98 | 0.99 |
|                                     | 2              | 0.51            | 1.00 | 0.78 | 0.99 | 0.93 | 0.99 | 0.98 | 0.99 | 0.99 | 0.99 |
|                                     | 3              | 0.67            | 0.99 | 0.87 | 0.99 | 0.97 | 0.99 | 0.99 | 0.98 | 0.99 | 0.98 |
|                                     | 4              | 0.72            | 1.00 | 0.88 | 0.99 | 0.95 | 0.99 | 0.98 | 0.98 | 0.99 | 0.98 |
| 1 kb up- and downstream             | 1              | 0.26            | 1.00 | 0.52 | 1.00 | 0.79 | 0.99 | 0.92 | 0.99 | 0.98 | 0.99 |
|                                     | 2              | 0.51            | 0.99 | 0.79 | 0.99 | 0.94 | 0.99 | 0.98 | 0.99 | 0.99 | 0.99 |
|                                     | 3              | 0.67            | 0.99 | 0.88 | 0.99 | 0.97 | 0.99 | 0.99 | 0.99 | 0.99 | 0.98 |
|                                     | 4              | 0.73            | 1.00 | 0.89 | 0.99 | 0.95 | 0.99 | 0.98 | 0.98 | 0.99 | 0.98 |
| Intergenic (> 1 kb away from genes) | 1              | 0.18            | 0.59 | 0.38 | 0.63 | 0.64 | 0.63 | 0.80 | 0.61 | 0.82 | 0.60 |
|                                     | 2              | 0.37            | 0.64 | 0.62 | 0.60 | 0.81 | 0.60 | 0.87 | 0.68 | 0.92 | 0.57 |
|                                     | 3              | 0.51            | 0.64 | 0.74 | 0.61 | 0.88 | 0.57 | 0.91 | 0.55 | 0.94 | 0.54 |
|                                     | 4              | 0.59            | 0.66 | 0.76 | 0.61 | 0.86 | 0.55 | 0.90 | 0.51 | 0.93 | 0.50 |

Shown are recall (R) and precision (P) estimates for different levels of read depth over simulated insertions and deletions found overlapping different genomic features.



**Supplementary Table 3. Validation of vg (v1.53.0) using simulated autotetraploids.**

| Allelic dosage | Simulated depth |      |      |      |      |      |      |      |      |      |
|----------------|-----------------|------|------|------|------|------|------|------|------|------|
|                | 5×              |      | 10×  |      | 20×  |      | 40×  |      | 80×  |      |
|                | R               | P    | R    | P    | R    | P    | R    | P    | R    | P    |
| 1              | 0.42            | 1.00 | 0.67 | 1.00 | 0.81 | 0.99 | 0.85 | 0.99 | 0.86 | 0.99 |
| 2              | 0.67            | 1.00 | 0.81 | 1.00 | 0.85 | 1.00 | 0.86 | 0.99 | 0.86 | 1.00 |
| 3              | 0.76            | 1.00 | 0.84 | 1.00 | 0.86 | 1.00 | 0.86 | 1.00 | 0.86 | 1.00 |
| 4              | 0.79            | 1.00 | 0.85 | 0.99 | 0.86 | 1.00 | 0.86 | 1.00 | 0.86 | 1.00 |

Shown are recall (R) and precision (P) estimates for different levels of read depth over simulated insertions and deletions.

**Supplementary Table 4. Results from GO enrichment analyses conducted on GEA outliers.**

| GO term                                 | Dataset    | Fold enrichment | <i>P</i> -value |
|-----------------------------------------|------------|-----------------|-----------------|
| Maintenance of seed dormancy            | Diploid    | 33              | 0.0015          |
| Cell surface receptor signaling pathway | Diploid    | 18              | 0.0054          |
| Plant-type hypersensitive response      | Tetraploid | 29              | 0.0022          |
| Starch catabolic process                | Tetraploid | 22              | 0.0031          |
| Formaldehyde catabolic process          | Tetraploid | 22              | 0.0031          |
| Defense response to bacterium           | Tetraploid | 14              | 0.0078          |
| Oligopeptide transport                  | All        | 21              | 0.0003          |
| Leaf development                        | All        | 3               | 0.0014          |
| Xanthophyll metabolic process           | All        | 25              | 0.0024          |
| Formaldehyde catabolic process          | All        | 22              | 0.0033          |
| Ethylene biosynthetic process           | All        | 13              | 0.0099          |

Shown are GO terms with  $P < 0.01$ , one-sided Fisher's exact test.

**Supplementary Table 5. Species used in estimating coding sequence conservation with GERP++.**

| Species                     | Source                                                                                                        |
|-----------------------------|---------------------------------------------------------------------------------------------------------------|
| <i>Aethionema arabicum</i>  | <a href="https://plantcode.cup.uni-freiburg.de/aetar_db/">https://plantcode.cup.uni-freiburg.de/aetar_db/</a> |
| <i>Arabidopsis thaliana</i> | Ensembl Plants                                                                                                |
| <i>Arabis alpina</i>        | <a href="http://www.arabis-alpina.org/refseq.html">http://www.arabis-alpina.org/refseq.html</a>               |
| <i>Boechera stricta</i>     | Phytozome                                                                                                     |
| <i>Brassica rapa</i>        | Ensembl Plants                                                                                                |
| <i>Camelina sativa</i>      | Ensembl Plants                                                                                                |
| <i>Capsella rubella</i>     | Phytozome                                                                                                     |
| <i>Cardamine hirsuta</i>    | <a href="http://chi.mpipz.mpg.de/assembly.html">http://chi.mpipz.mpg.de/assembly.html</a>                     |
| <i>Carica papaya</i>        | Phytozome                                                                                                     |
| <i>Citrus clementina</i>    | Ensembl Plants                                                                                                |
| <i>Cucumis sativus</i>      | Ensembl Plants                                                                                                |
| <i>Draba nivalis</i>        | <a href="https://doi.org/10.5061/dryad.pg4f4qrm4">https://doi.org/10.5061/dryad.pg4f4qrm4</a>                 |
| <i>Eucalyptus grandis</i>   | Ensembl Plants                                                                                                |
| <i>Eutrema salsugineum</i>  | Phytozome                                                                                                     |
| <i>Fragaria vesca</i>       | Phytozome                                                                                                     |
| <i>Glycine max</i>          | Ensembl Plants                                                                                                |
| <i>Gossypium raimondii</i>  | Ensembl Plants                                                                                                |
| <i>Juglans regia</i>        | Ensembl Plants                                                                                                |
| <i>Lobularia maritima</i>   | <a href="https://ngdc.cncb.ac.cn/gwh/Assembly/9796/show">https://ngdc.cncb.ac.cn/gwh/Assembly/9796/show</a>   |
| <i>Malus domestica</i>      | Ensembl Plants                                                                                                |
| <i>Manihot esculenta</i>    | Ensembl Plants                                                                                                |
| <i>Medicago truncatula</i>  | Ensembl Plants                                                                                                |
| <i>Pistacia vera</i>        | Ensembl Plants                                                                                                |
| <i>Populus trichocarpa</i>  | Ensembl Plants                                                                                                |
| <i>Quercus lobata</i>       | Ensembl Plants                                                                                                |
| <i>Raphanus sativus</i>     | <a href="https://plantgarden.jp/">https://plantgarden.jp/</a>                                                 |
| <i>Schrenkiella parvula</i> | Phytozome                                                                                                     |
| <i>Theobroma cacao</i>      | Ensembl Plants                                                                                                |
| <i>Vitis vinifera</i>       | Ensembl Plants                                                                                                |
